# Supplementary material for: Biomimetic and immunomodulatory baicalin-loaded graphene oxide-demineralized bone matrix scaffold for in vivo bone regeneration
Source: Royal Society of Chemistry journal article supplement (doi:10.1039/d1tb00618e), 2021-01-01
Supplement: d1tb00618e1.pdf [file d1tb00618e1.pdf]

Supporting information for

**Biomimetic and Immunomodulatory Baicalin-loaded Graphene  
Oxide-Demineralized Bone Matrix Scaffold for *In Vivo* Bone  
Regeneration**

Bing Guo<sup>#a</sup>, Xiaodong Feng<sup>#b</sup>, Yun Wang<sup>c</sup>, Xiansong Wang<sup>\*c</sup>, Yue He<sup>\*a</sup>

<sup>a</sup>Department of Oral and Maxillofacial-Head and Neck Oncology, Shanghai Ninth People's Hospital, Shanghai Jiao Tong University School of Medicine; College of Stomatology, Shanghai Jiao Tong University; National Center for Stomatology; National Clinical Research Center of Stomatology; Shanghai Key Laboratory of Stomatology; Shanghai, 200011, China.

<sup>b</sup>Department of Clinical Laboratory, The Affiliated Hospital of Qingdao University, Qingdao University, Qingdao 266000, China;

<sup>c</sup>Department of Plastic and Reconstructive Surgery, Shanghai Key Laboratory of Tissue Engineering, Shanghai Ninth People's Hospital, Shanghai Jiao Tong University School of Medicine, Shanghai, 200011, China.

Bing Guo and Xiaodong Feng have contributed equally to this work.

**\*Corresponding author.**

E-mail: [eddielew@alumni.sjtu.edu.cn](mailto:eddielew@alumni.sjtu.edu.cn) (Yue He); wonderluis@126.com (Xiansong Wang)

Supplementary figures and table

**Preparation and characterization of GO-BAI/DBM**

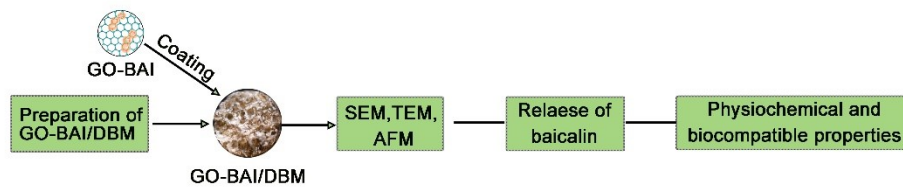

**In vitro assay**

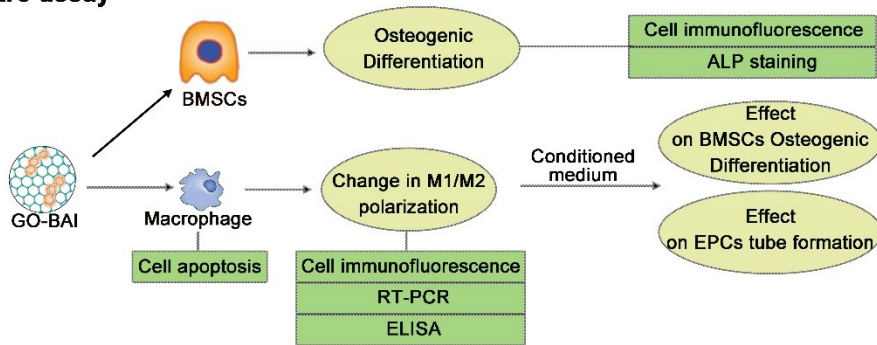

**Fibrosis formation**

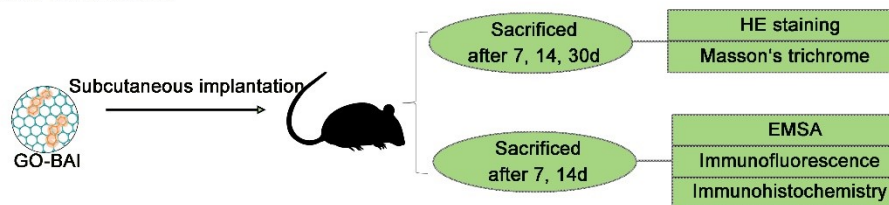

**Bone defect repair**

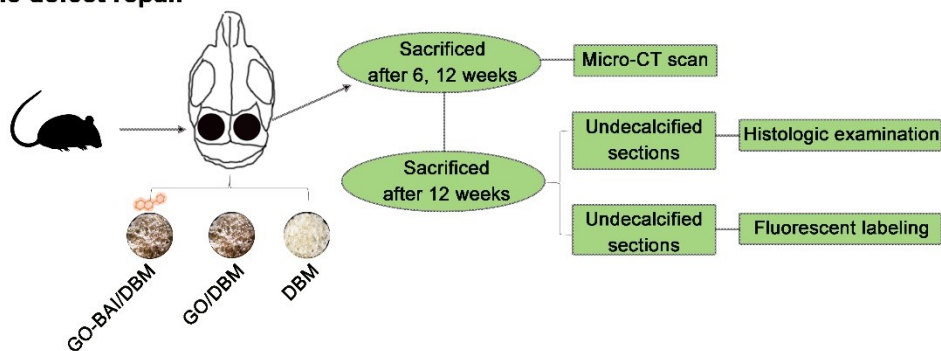

**Fig. S1** Flow chart depicting the sequence of experiments conducted in the present study.

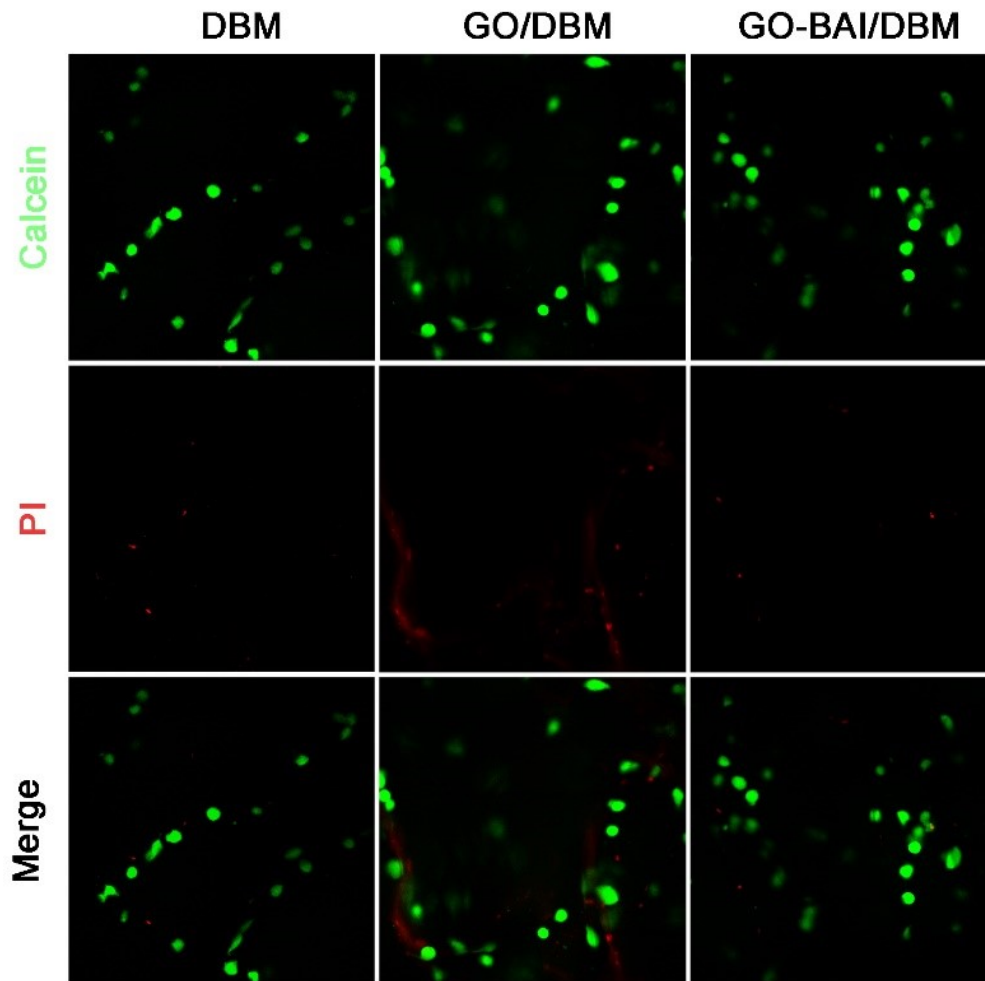

**Fig. S2** Viability of HUVECs cells grown on the GO-BAI coated DBM scaffolds. Confocal microscopy imaging of HUVECs that were cultured on the constructs with LIVE/DEAD staining at days 1 (green color: live cells, red color: dead cells).

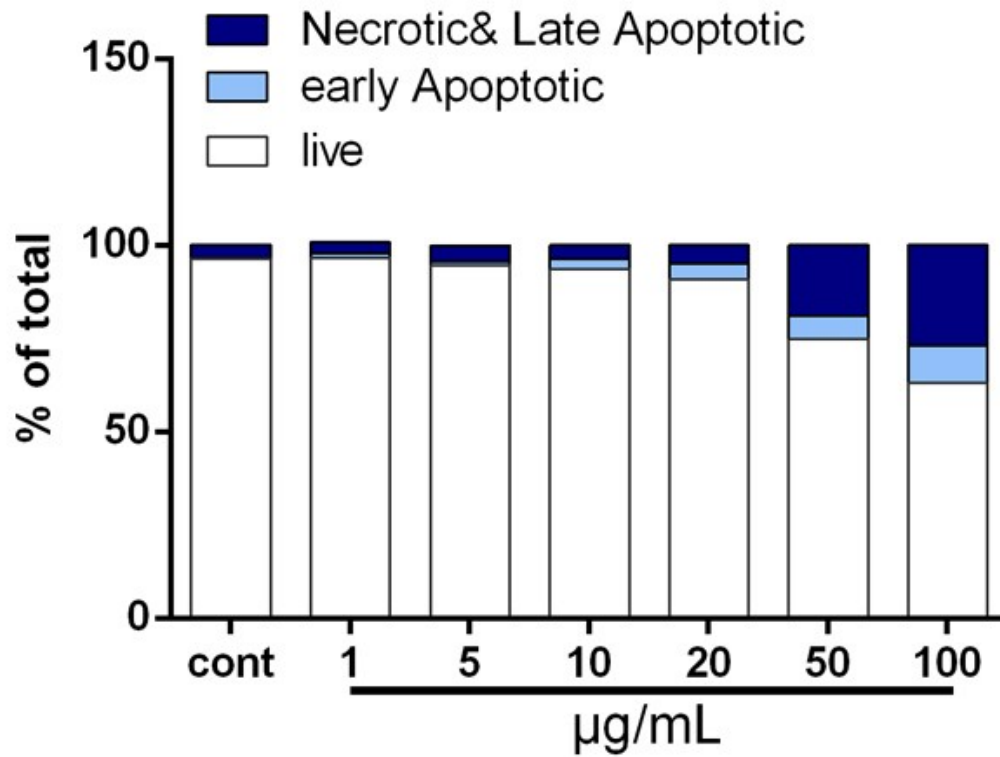

**Fig. S3** Cytotoxicity of GO in Raw 264.7 macrophages. Cell viability of Raw 264.7 cells upon exposure to GO for 24 h at various concentrations determined by LIVE/DEAD Viability/Cytotoxicity assay.

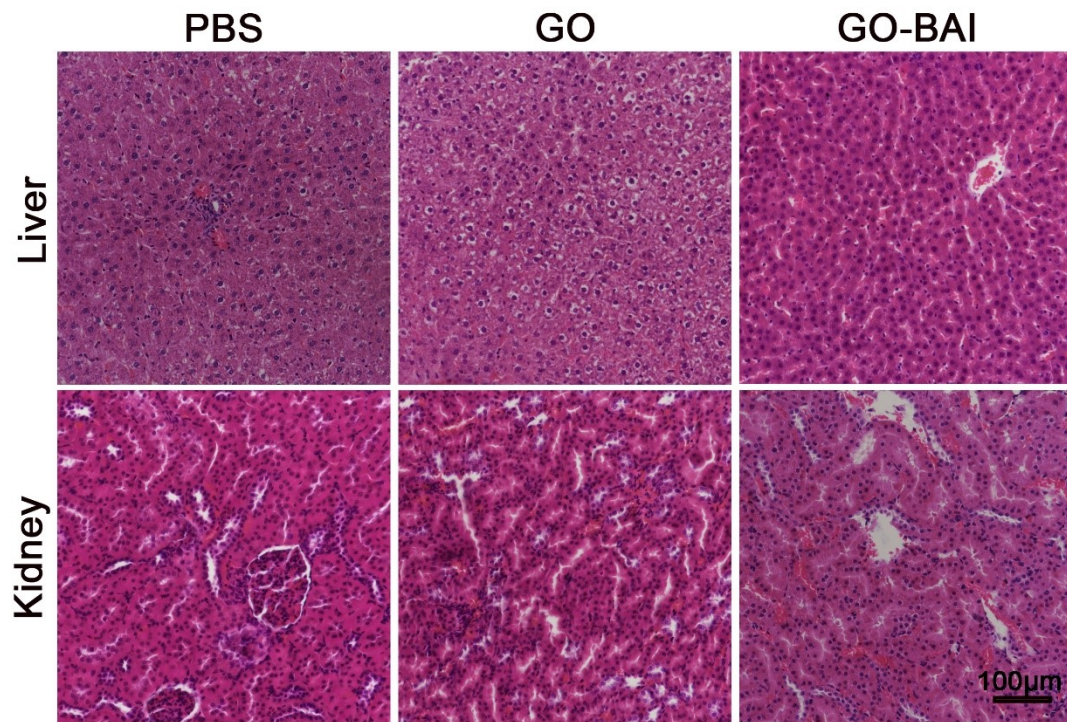

**Fig. S4** Biocompatibility of GO-BAI. The liver and kidney showed no obvious pathological changes in HE staining at 1 month after subcutaneous injection of GO and GO-BAI (5 mg/kg in 100  $\mu$ L of saline).

**Tab. S1.** Primer pairs used in the RT-PCR.

| Gene name            | Direction | Sequence (5'-3')             |
|----------------------|-----------|------------------------------|
| IL-1 $\beta$ (mouse) | Forward   | GTATGGGCTGGACTGTTTC          |
|                      | Reverse   | GCTGTCTGCTCATTACG            |
| TNF- $\alpha$        | Forward   | GTCCATTCTGAGTTCTG            |
|                      | Reverse   | GAAAGGTCTGAAGGTAGG           |
| Arg-1                | Forward   | CAGAAGAATGGAAGAGTCAG         |
|                      | Reverse   | CAGATATGCAGGGAGTCACC         |
| Retnl- $\alpha$      | Forward   | CTTTCCTGAGATTCTGCCCCAG       |
|                      | Reverse   | CACAAGCACACCCAGTAGCA         |
| GAPDH (mouse)        | Forward   | CACTCACGGCAAATTCAACGGCA<br>C |
|                      | Reverse   | GACTCCACGACATACTCAGCAC       |
| ALP (rat)            | Forward   | GAAAGAGAAAGACCCCAGTTAC       |
|                      | Reverse   | ATACCATCTCCCAGGAACAT         |
| OCN                  | Forward   | GAACAGACAAGTCCCACACAG        |
|                      | Reverse   | CAGGTCAGAGAGGCAGAATG         |
| OPN                  | Forward   | CGCATTACAGCAAACACTCAG        |
|                      | Reverse   | GTCATCGTCGTCGTCATCAT         |
| OSX                  | Forward   | CCTCTGCGGGACTCAACAAC         |
|                      | Reverse   | AGCCCATTAGTGCTTGTAAGG        |
| $\beta$ -actin (rat) | Forward   | CCTCTATGCCAACACAGT           |
|                      | Reverse   | AGCCACCAATCCACACAG           |
